# Supplementary material for: Biogeography of Paenibacillus larvae, the causative agent of American foulbrood, using a new multilocus sequence typing scheme
Source: PubMed Central journal article supplement (PMC4405054; doi:10.1111/1462-2920.12625), 2014-11-28
Supplement: emi0017-1414-sd1.pdf [file emi0017-1414-sd1.pdf]

Table S1. Genes for which primers were designed and then rejected

| <b>Gene</b> | <b>Forward primer</b>                                | <b>Reverse primer</b>                                  | <b>Annealing temp (°C)</b> |
|-------------|------------------------------------------------------|--------------------------------------------------------|----------------------------|
| <i>adk</i>  | 5'ATGCCTACCTTGCTAACAT3'                              | 5'ATGCTTCTCCGTTTCGTG3'                                 | 56                         |
| <i>ccpA</i> | 5'GTTTCTCGGGTTGTGAATAA3'                             | 5'CCGTCTACCTGTTTTTCAAG3'                               | 55                         |
| <i>chiA</i> | 5'GCGGATGAACTCTAGTGAAC3'                             | 5'ACGATTAACGAGCGAAC3'                                  | 55                         |
| <i>gdh</i>  | 5'TATCATTACAGGGGTTCC3'                               | 5'CATAGCTAATACGCCTGCTT3'                               | 55                         |
| <i>gmk</i>  | 5'AAAGACAATGGAAAGAGAAAGA3'                           | 5'ATTGTTCCATCAGACGAATC3'<br>5'CTGATGGAACAATATGATTACG3' | 55                         |
| <i>ilvD</i> | 5'GATGAACTGTCTGGCTGAAG3'<br>5'AAGGCGGCATCATAAAAGTC3' | 5'CCCTGTTCATTATGTGGATTAT3'<br>5'AATCTTCTTCGGATATTGTC3' | 57<br>56                   |
| <i>panC</i> | 5'TCTCTCCCAATGAAATATG3'<br>5'CTTTATCCGGCTGAACAATA3'  | 5'TTAAAGATGCACAGCAAGTG3'<br>5'GGAATTAACGGGACATA3'      | 55<br>55                   |
| <i>sigK</i> | 5'GGAGAAGACCTGGAAGATTT3'                             | 5'TTTTGTAATAATTCATGATAAAGC3'                           | 54                         |
| <i>tpi</i>  | 5'ATATATTCGCGCACGTTTC3'                              | 5'ACGTTCAAGGGAACCTCTAT3'                               | 55                         |
