# Supplementary material for: Biogeography of Paenibacillus larvae, the causative agent of American foulbrood, using a new multilocus sequence typing scheme
Source: PubMed Central journal article supplement (PMC4405054; doi:10.1111/1462-2920.12625), 2014-11-28
Supplement: emi0017-1414-sd2.pdf [file emi0017-1414-sd2.pdf]

**Table S2**

Origins of isolates typed with MLST scheme

| Isolate                 | Country of origin                   | Region        | Continent     | ERIC type | Sequence Type | population (FST analysis) |
|-------------------------|-------------------------------------|---------------|---------------|-----------|---------------|---------------------------|
| 11-8014                 | New Zealand                         |               | Australasia   | I         | 1             | New Zealand               |
| 12-8090                 | Cuba                                |               | North America | I         | 1             | North America             |
| 12-8293                 | Egypt, Ethiopia                     |               | Africa        | I         | 2             | Africa                    |
| 12-8296                 | Egypt, Ethiopia                     |               | Africa        | I         | 2             | Africa                    |
| 12-8299                 | Egypt, Ethiopia                     |               | Africa        | I         | 2             | Africa                    |
| 12-8302                 | Egypt, Ethiopia                     |               | Africa        | I         | 2             | Africa                    |
| 12-8338                 | France                              |               | Europe        | I         | 2             | France/Channel Isles      |
| 12-8343                 | France                              |               | Europe        | I         | 2             | France/Channel Isles      |
| p8580 (p143 2012.02.LO) | France                              |               | Europe        |           | 2             | France/Channel Isles      |
| 12-8384                 | Georgia, Croatia                    |               | Europe        | I         | 2             | -                         |
| 12-8387                 | Georgia, Croatia                    |               | Europe        | I         | 2             | -                         |
| 12-8382                 | Georgia, Croatia                    |               | Europe        | I         | 2             | -                         |
| 03-159                  | Germany                             | Saxony-Anhalt | Europe        | I         | 2             | Germany                   |
| 01-391                  | Germany                             |               | Europe        | I         | 2             | Germany                   |
| 12-8314                 | Greece                              | Crete         | Europe        | I         | 2             | Greece                    |
| 1403/1 (P8467)          | Italy                               |               | Europe        |           | 2             | Italy                     |
| 1267/1 (P8468)          | Italy                               |               | Europe        |           | 2             | Italy                     |
| 1388/1 (P8465)          | Italy                               |               | Europe        |           | 2             | Italy                     |
| UK6/10                  | UK                                  | England       | Europe        | I         | 2             | UK                        |
| 12-8109 (4)             | Isreal, Malta                       |               | mixed         | I         | 2             | -                         |
| 11-8020                 | New Zealand                         |               | Australasia   | I         | 3             | New Zealand               |
| 11-8032                 | Mexico, Nicaragua, Argentina, Chile |               | mixed         | I         | 4             | -                         |
| 12-8320                 | Bangladesh                          |               | Asia          | I         | 5             | Asia                      |
| 11-8021                 | New Zealand                         |               | Australasia   | I         | 5             | New Zealand               |
| 11-8022                 | New Zealand                         |               | Australasia   | I         | 5             | New Zealand               |
| 11-8023                 | New Zealand                         |               | Australasia   | I         | 5             | New Zealand               |
| 11-8024                 | New Zealand                         |               | Australasia   | I         | 5             | New Zealand               |
| 11-8026                 | New Zealand                         |               | Australasia   | I         | 5             | New Zealand               |
| 11-8027                 | New Zealand                         |               | Australasia   | I         | 5             | New Zealand               |

|                         |             |               |             |   |   |                      |
|-------------------------|-------------|---------------|-------------|---|---|----------------------|
| 11-8028                 | New Zealand |               | Australasia | I | 5 | New Zealand          |
| 11-8029                 | New Zealand |               | Australasia | I | 5 | New Zealand          |
| 11-8010                 | New Zealand |               | Australasia | I | 5 | New Zealand          |
| 11-8011                 | New Zealand |               | Australasia | I | 5 | New Zealand          |
| 11-8012                 | New Zealand |               | Australasia | I | 5 | New Zealand          |
| 12-8348                 | France      |               | Europe      | I | 5 | France/Channel Isles |
| 12-8352                 | France      |               | Europe      | I | 5 | France/Channel Isles |
| p8581 (p106 2012.06.LO) | France      |               | Europe      |   | 5 | France/Channel Isles |
| 12-367                  | Germany     | Berlin        | Europe      | I | 5 | Germany              |
| 11-152                  | Germany     | Saxony-Anhalt | Europe      | I | 5 | Germany              |
| 09-331                  | Germany     | Saxony-Anhalt | Europe      | I | 5 | Germany              |
| P7839 (Thur 99)         | Germany     | Thuringia     | Europe      | I | 5 | Germany              |
| p7840 (Thur101)         | Germany     | Thuringia     | Europe      | I | 5 | Germany              |
| 02-360                  | Germany     |               | Europe      | I | 5 | Germany              |
| 03-019                  | Germany     |               | Europe      | I | 5 | Germany              |
| 12-8265                 | Greece      |               | Europe      | I | 5 | Greece               |
| 12-8268                 | Greece      |               | Europe      | I | 5 | Greece               |
| 12-8391                 | Hungary     |               | Europe      | I | 5 | -                    |
| AFB7                    | Spain       |               | Europe      |   | 5 | Spain/ Tenerife      |
| 12-8242                 | Switzerland |               | Europe      | I | 5 | -                    |
| 12-8245                 | Switzerland |               | Europe      | I | 5 | -                    |
| 12-8248                 | Switzerland |               | Europe      | I | 5 | -                    |
| 12-8251                 | Switzerland |               | Europe      | I | 5 | -                    |
| UK1/10                  | UK          | England       | Europe      | I | 5 | UK                   |
| UK11/6                  | UK          | England       | Europe      | I | 5 | UK                   |
| UK15/10                 | UK          | England       | Europe      | I | 5 | UK                   |
| UK16/8                  | UK          | England       | Europe      | I | 5 | UK                   |
| UK17/10                 | UK          | England       | Europe      | I | 5 | UK                   |
| UK17/9                  | UK          | England       | Europe      | I | 5 | UK                   |
| UK3/8                   | UK          | England       | Europe      | I | 5 | UK                   |
| UK6/8                   | UK          | England       | Europe      | I | 5 | UK                   |
| UK7/10                  | UK          | England       | Europe      | I | 5 | UK                   |

|                   |          |         |               |   |   |                      |
|-------------------|----------|---------|---------------|---|---|----------------------|
| UK12/10           | UK       | England | Europe        | I | 5 | UK                   |
| UK14/10           | UK       | England | Europe        | I | 5 | UK                   |
| UK2/10            | UK       | England | Europe        | I | 5 | UK                   |
| UK2/7             | UK       | England | Europe        | I | 5 | UK                   |
| UK2/9             | UK       | England | Europe        | I | 5 | UK                   |
| UK20/10           | UK       | England | Europe        | I | 5 | UK                   |
| UK5/9             | UK       | England | Europe        | I | 5 | UK                   |
| UK7/9             | UK       | England | Europe        | I | 5 | UK                   |
| UK33/9            | UK       | England | Europe        | I | 5 | UK                   |
| UK38/9            | UK       | England | Europe        | I | 5 | UK                   |
| UK21/8            | UK       | England | Europe        | I | 5 | UK                   |
| UK22/10           | UK       | England | Europe        | I | 5 | UK                   |
| UK26/7            | UK       | England | Europe        | I | 5 | UK                   |
| UK24/10           | UK       | England | Europe        | I | 5 | UK                   |
| UK26/9            | UK       | England | Europe        | I | 5 | UK                   |
| UK27/7            | UK       | England | Europe        | I | 5 | UK                   |
| UK27/9            | UK       | England | Europe        | I | 5 | UK                   |
| UK35/9            | UK       | England | Europe        | I | 5 | UK                   |
| UK22/11           | UK       | England | Europe        | I | 5 | UK                   |
| UK21/10           | UK       | England | Europe        | I | 5 | UK                   |
| UK22/9            | UK       | England | Europe        | I | 5 | UK                   |
| S1/1              | UK       | England | Europe        | I | 5 | UK                   |
| S2/1              | UK       | England | Europe        | I | 5 | UK                   |
| 12-8273           | Canada   |         | North America | I | 5 | North America        |
| 12-8277           | Canada   |         | North America | I | 5 | North America        |
| 12-8278           | Canada   |         | North America | I | 5 | North America        |
| 12-8281           | Canada   |         | North America | I | 5 | North America        |
| 12-8091 (2)       | Cuba     |         | North America | I | 5 | North America        |
| p6678 (LMG 16241) | -        |         |               | I | 5 | -                    |
| p8582             | France   |         | Europe        |   | 6 | France/Channel Isles |
| J3/1              | Jersey   |         | Europe        | I | 6 | France/Channel Isles |
| 12-8378           | Mongolia |         | Asia          | I | 7 | Asia                 |

|                   |                   |         |               |     |    |                      |
|-------------------|-------------------|---------|---------------|-----|----|----------------------|
| 12-8380           | Mongolia          |         | Asia          | I   | 7  | Asia                 |
| P8476             | France            |         | Europe        |     | 7  | France/Channel Isles |
| UK15/6            | UK                | England | Europe        | I   | 7  | UK                   |
| UK20/6            | UK                | England | Europe        | I   | 7  | UK                   |
| UK3/6             | UK                | England | Europe        | I   | 7  | UK                   |
| UK10/6            | UK                | England | Europe        | I   | 7  | UK                   |
| UK10/7            | UK                | England | Europe        | I   | 7  | UK                   |
| UK21/6            | UK                | England | Europe        | I   | 7  | UK                   |
| UK21/7            | UK                | England | Europe        | I   | 7  | UK                   |
| UK23/6            | UK                | England | Europe        | I   | 7  | UK                   |
| UK25/6            | UK                | England | Europe        | I   | 7  | UK                   |
| UK34/6            | UK                | England | Europe        | I   | 7  | UK                   |
| UK36/6            | UK                | England | Europe        | I   | 7  | UK                   |
| UK37/6            | UK                | England | Europe        | I   | 7  | UK                   |
| UK38/6            | UK                | England | Europe        | I   | 7  | UK                   |
| (P6266) LMG 16252 | -                 |         |               | III | 8  | -                    |
| ATCC49483         | -                 |         |               | IV  | 8  | -                    |
| DSM 3615          | -                 |         |               | IV  | 8  | -                    |
| (P6264) LMG 16247 | -                 |         |               | IV  | 8  | -                    |
| LMG6911           | -                 |         |               | IV  | 8  | -                    |
| P6993 (LMG 14427) | -                 |         |               | IV  | 8  | -                    |
| P6260 (LMG 16250) | -                 |         |               | IV  | 8  | -                    |
| P6265 (LMG 16249) | -                 |         |               | IV  | 8  | -                    |
| 11-8050           | Chile             |         | South America | III | 9  | South America        |
| 11-8051           | Chile             |         | South America | III | 9  | South America        |
| 12-8120           | Arabian Peninsula |         | Asia          | II  | 10 | Arabian Peninsula    |
| 12-8121           | Arabian Peninsula |         | Asia          | II  | 10 | Arabian Peninsula    |
| 12-8122           | Arabian Peninsula |         | Asia          | II  | 10 | Arabian Peninsula    |
| 12-8123           | Arabian Peninsula |         | Asia          | II  | 10 | Arabian Peninsula    |
| 12-8124           | Arabian Peninsula |         | Asia          | II  | 10 | Arabian Peninsula    |
| 12-8125           | Arabian Peninsula |         | Asia          | II  | 10 | Arabian Peninsula    |
| 12-8126           | Arabian Peninsula |         | Asia          | II  | 10 | Arabian Peninsula    |

|                  |                         |                           |             |    |    |                   |
|------------------|-------------------------|---------------------------|-------------|----|----|-------------------|
| 12-8127          | Arabian Peninsula       |                           | Asia        | II | 10 | Arabian Peninsula |
| 12-8128          | Arabian Peninsula       |                           | Asia        | II | 10 | Arabian Peninsula |
| 12-8119          | Arabian Peninsula       |                           | Asia        | II | 10 | Arabian Peninsula |
| 12-8230          | Arabian Peninsula       |                           | Asia        | II | 10 | Arabian Peninsula |
| 12-8231          | Arabian Peninsula       |                           | Asia        | II | 10 | Arabian Peninsula |
| 12-8232          | Arabian Peninsula       |                           | Asia        | II | 10 | Arabian Peninsula |
| 12-8170          | Japan, Singapore, China |                           | Asia        | II | 10 | Asia              |
| 12-8172          | Japan, Singapore, China |                           | Asia        | II | 10 | Asia              |
| 12-8175          | Japan, Singapore, China |                           | Asia        | II | 10 | Asia              |
| 12-8177          | Japan, Singapore, China |                           | Asia        | II | 10 | Asia              |
| 12-8179          | Japan, Singapore, China |                           | Asia        | II | 10 | Asia              |
| 12-8220          | Kazakhstan              |                           | Asia        | II | 10 | Asia              |
| 12-8221          | Kazakhstan              |                           | Asia        | II | 10 | Asia              |
| 12-8222          | Kazakhstan              |                           | Asia        | II | 10 | Asia              |
| 12-8130          | Australia               |                           | Australasia | II | 10 | Australia         |
| 12-8131          | Australia               |                           | Australasia | II | 10 | Australia         |
| 12-8132          | Australia               |                           | Australasia | II | 10 | Australia         |
| 12-8135          | Australia               |                           | Australasia | II | 10 | Australia         |
| 12-8136          | Australia               |                           | Australasia | II | 10 | Australia         |
| 12-8137          | Australia               |                           | Australasia | II | 10 | Australia         |
| 12-8138          | Australia               |                           | Australasia | II | 10 | Australia         |
| 12-8139          | Australia               |                           | Australasia | II | 10 | Australia         |
| P7860 (11-8013)  | New Zealand             |                           | Australasia | II | 10 | New Zealand       |
| P7846            | Austria                 |                           | Europe      | II | 10 | -                 |
| 03-522           | Germany                 | Brandenburg, Kleinmachnow | Europe      | II | 10 | Germany           |
| 03-525           | Germany                 | Brandenburg, Kleinmachnow | Europe      | II | 10 | Germany           |
| 02-009           | Germany                 | SH / Bad Schwartau        | Europe      | II | 10 | Germany           |
| p7842 (Thur 258) | Germany                 | Thuringia                 | Europe      | II | 10 | Germany           |
| 12-109           | Germany                 | Veitshöchheim             | Europe      | II | 10 | Germany           |
| 12-510           | Germany                 | Veitshöchheim             | Europe      | II | 10 | Germany           |
| 01-649           | Germany                 |                           | Europe      | II | 10 | Germany           |
| 00-1163          | Germany                 |                           | Europe      | II | 10 | Germany           |

|                     |                |                    |               |    |    |               |
|---------------------|----------------|--------------------|---------------|----|----|---------------|
| 00-0869             | Germany        |                    | Europe        | II | 10 | Germany       |
| 00-897              | Germany        |                    | Europe        | II | 10 | Germany       |
| 11-8080             | Greece         | Mount Athos        | Europe        | II | 10 | Greece        |
| 11-8081             | Greece         | Mount Athos        | Europe        | II | 10 | Greece        |
| 12-8371             | Russia         |                    | Europe        | II | 10 | -             |
| 12-8369             | Russia         |                    | Europe        | II | 10 | -             |
| 12-8373             | Russia         |                    | Europe        | II | 10 | -             |
| 12-8375             | Russia         |                    | Europe        | II | 10 | -             |
| 26-02               | Sweden         |                    | Europe        | II | 10 | Scandinavia   |
| P7371               | Sweden         |                    | Europe        | II | 10 | Scandinavia   |
| 12-8272             | Canada         |                    | North America | II | 10 | North America |
| p8583 (AP1141 nr 2) | Austria        |                    | Europe        |    | 11 | -             |
| P7844 (452 03)      | Czech Republic |                    | Europe        | II | 11 | -             |
| 8514-03             | Finland        |                    | Europe        | II | 11 | Scandinavia   |
| 8533-03             | Finland        |                    | Europe        | II | 11 | Scandinavia   |
| P7850 (7774 03)     | Finland        |                    | Europe        | II | 11 | Scandinavia   |
| p7852 (8527/03)     | Finland        |                    | Europe        | II | 11 | Scandinavia   |
| 02-334              | Germany        | Berlin             | Europe        | II | 11 | Germany       |
| 03-194              | Germany        | Berlin             | Europe        | II | 11 | Germany       |
| 03-200              | Germany        | Berlin             | Europe        | II | 11 | Germany       |
| 04-309              | Germany        | Berlin             | Europe        | II | 11 | Germany       |
| 05-085              | Germany        | Berlin             | Europe        | II | 11 | Germany       |
| p7853 (646D2920/03) | Germany        | Detmold            | Europe        | II | 11 | Germany       |
| P7854 (647D2920 03) | Germany        | Detmold            | Europe        | II | 11 | Germany       |
| Uni_Saarl.909       | Germany        | Saarland           | Europe        | II | 11 | Germany       |
| Uni_Saarl.913       | Germany        | Saarland           | Europe        | II | 11 | Germany       |
| Uni_Saarl.914       | Germany        | Saarland           | Europe        | II | 11 | Germany       |
| Uni_Saarl.916       | Germany        | Saarland           | Europe        | II | 11 | Germany       |
| Uni_Saarl.918       | Germany        | Saarland           | Europe        | II | 11 | Germany       |
| 03-098              | Germany        | Schleswig-Holstein | Europe        | II | 11 | Germany       |
| 10-228              | Germany        | Veitshöchheim      | Europe        | II | 11 | Germany       |
| 10-232              | Germany        | Veitshöchheim      | Europe        | II | 11 | Germany       |

|                 |                |               |             |    |    |                      |
|-----------------|----------------|---------------|-------------|----|----|----------------------|
| 10-654          | Germany        | Veitshöchheim | Europe      | II | 11 | Germany              |
| 10-658          | Germany        | Veitshöchheim | Europe      | II | 11 | Germany              |
| 10-662          | Germany        | Veitshöchheim | Europe      | II | 11 | Germany              |
| 10-678          | Germany        | Veitshöchheim | Europe      | II | 11 | Germany              |
| 11-365          | Germany        | Veitshöchheim | Europe      | II | 11 | Germany              |
| 11-370          | Germany        | Veitshöchheim | Europe      | II | 11 | Germany              |
| 11-381          | Germany        | Veitshöchheim | Europe      | II | 11 | Germany              |
| 11-577          | Germany        | Veitshöchheim | Europe      | II | 11 | Germany              |
| 11-593          | Germany        | Veitshöchheim | Europe      | II | 11 | Germany              |
| 11-599          | Germany        | Veitshöchheim | Europe      | II | 11 | Germany              |
| 11-627          | Germany        | Veitshöchheim | Europe      | II | 11 | Germany              |
| 12-116          | Germany        | Veitshöchheim | Europe      | II | 11 | Germany              |
| 12-128          | Germany        | Veitshöchheim | Europe      | II | 11 | Germany              |
| 12-134          | Germany        | Veitshöchheim | Europe      | II | 11 | Germany              |
| 12-147          | Germany        | Veitshöchheim | Europe      | II | 11 | Germany              |
| 12-490          | Germany        | Veitshöchheim | Europe      | II | 11 | Germany              |
| 12-498          | Germany        | Veitshöchheim | Europe      | II | 11 | Germany              |
| 12-520          | Germany        | Veitshöchheim | Europe      | II | 11 | Germany              |
| 11-403          | Germany        | Veitshöchheim | Europe      | II | 11 | Germany              |
| 01-1714         | Germany        |               | Europe      | II | 11 | Germany              |
| 00-0775         | Germany        |               | Europe      | II | 11 | Germany              |
| P7851 (8501 03) | Finland        |               | Europe      | II | 12 | Scandinavia          |
| P7862 (11-8025) | New Zealand    |               | Australasia | I  | 13 | New Zealand          |
| 12-8262         | Greece         |               | Europe      | I  | 13 | Greece               |
| AFB2            | Spain          |               | Europe      |    | 13 | Spain/ Tenerife      |
| J1/1            | Jersey         |               | Europe      | I  | 14 | France/Channel Isles |
| L1/1            | South Africa   |               | Africa      | I  | 15 | Africa               |
| 12-8133         | Australia      |               | Australasia | I  | 15 | Australia            |
| 12-8134         | Australia      |               | Australasia | I  | 15 | Australia            |
| P7847           | Austria        |               | Europe      | I  | 15 | -                    |
| P7848           | Austria        |               | Europe      | I  | 15 | -                    |
| P7843 (308 03)  | Czech Republic |               | Europe      | I  | 15 | -                    |

|                 |                                     |               |               |   |    |                      |
|-----------------|-------------------------------------|---------------|---------------|---|----|----------------------|
| 01-440          | Germany                             | Saxony-Anhalt | Europe        | I | 15 | Germany              |
| p7841(Thu 170)  | Germany                             | Thuringia     | Europe        | I | 15 | Germany              |
| 01-445          | Germany                             |               | Europe        | I | 15 | Germany              |
| 01-358          | Germany                             |               | Europe        | I | 15 | Germany              |
| 03-384          | Germany                             |               | Europe        | I | 15 | Germany              |
| 782/1           | Italy                               |               | Europe        |   | 15 | Italy                |
| 679/1 (P8466)   | Italy                               |               | Europe        |   | 15 | Italy                |
| J20/1           | Jersey                              |               | Europe        | I | 15 | France/Channel Isles |
| J47/1           | Jersey                              |               | Europe        | I | 15 | France/Channel Isles |
| 12-8356         | Poland                              |               | Europe        | I | 15 | Poland               |
| 12-8361         | Poland                              |               | Europe        | I | 15 | Poland               |
| 12-8282         | Tenerife                            |               | Europe        | I | 15 | Spain/ Tenerife      |
| 12-8285         | Tenerife                            |               | Europe        | I | 15 | Spain/ Tenerife      |
| 12-8288         | Tenerife                            |               | Europe        | I | 15 | Spain/ Tenerife      |
| 12-8291         | Tenerife                            |               | Europe        | I | 15 | Spain/ Tenerife      |
| UK1/8           | UK                                  | England       | Europe        | I | 15 | UK                   |
| UK11/10         | UK                                  | England       | Europe        | I | 15 | UK                   |
| UK13/9          | UK                                  | England       | Europe        | I | 15 | UK                   |
| UK3/10          | UK                                  | England       | Europe        | I | 15 | UK                   |
| UK23/9          | UK                                  | England       | Europe        | I | 15 | UK                   |
| UK21/11         | UK                                  | England       | Europe        | I | 15 | UK                   |
| UK1/9           | UK                                  | Wales         | Europe        | I | 15 | UK                   |
| P7858 (UK 1991) | UK                                  |               | Europe        | I | 15 | UK                   |
| 11-8030         | Mexico, Nicaragua, Argentina, Chile |               | mixed         | I | 15 | -                    |
| 11-8070         | Mexico                              |               | North America | I | 15 | North America        |
| 12-8304         | USA                                 |               | North America | I | 15 | North America        |
| 12-8306         | USA                                 |               | North America | I | 15 | North America        |
| 12-8308         | USA                                 |               | North America | I | 15 | North America        |
| 12-8310         | USA                                 |               | North America | I | 15 | North America        |
| USA-21          | USA                                 |               | North America | I | 15 | North America        |
| 11-8061         | Argentina                           |               | South America | I | 15 | South America        |
| P7864 (11-8062) | Argentina                           |               | South America | I | 15 | South America        |



|                 |                                     |         |               |    |    |
|-----------------|-------------------------------------|---------|---------------|----|----|
| B-3650          | -                                   |         |               | 15 | -  |
| 11-8031         | Mexico, Nicaragua, Argentina, Chile |         | mixed         | I  | 16 |
| 02-129          | Germany                             |         | Europe        | I  | 17 |
| 02-130          | Germany                             |         | Europe        | I  | 17 |
| 12-8366         | Poland                              |         | Europe        | I  | 17 |
| P7370           | Sweden                              |         | Europe        | I  | 17 |
| P7857 (UK 1961) | UK                                  |         | Europe        | I  | 17 |
| ATCC9545        | -                                   |         |               | I  | 17 |
| 11-8040         | New Zealand                         |         | Australasia   | I  | 18 |
| 1487/1          | Italy                               |         | Europe        |    | 18 |
| 2358/1          | Italy                               |         | Europe        |    | 18 |
| UK16/6          | UK                                  | England | Europe        | I  | 18 |
| UK8/10          | UK                                  | England | Europe        | I  | 18 |
| UK27/6          | UK                                  | England | Europe        | I  | 18 |
| UK40/6          | UK                                  | England | Europe        | I  | 18 |
| UK14/7          | UK                                  | Wales   | Europe        | I  | 18 |
| UK5/8           | UK                                  | Wales   | Europe        | I  | 18 |
| UK9/7           | UK                                  | Wales   | Europe        | I  | 18 |
| UK28/7          | UK                                  | Wales   | Europe        | I  | 18 |
| P7856 (UK 1957) | UK                                  |         | Europe        | I  | 18 |
| 08-100          | USA                                 |         | North America | I  | 18 |
| USA-148         | USA                                 |         | North America | I  | 18 |
| USA-38          | USA                                 |         | North America | I  | 18 |
| P6254           | -                                   |         |               | I  | 18 |
| 12-8322         | Bangladesh                          |         | Asia          | I  | 19 |
| 12-8324         | Bangladesh                          |         | Asia          | I  | 19 |
| 12-8326         | Bangladesh                          |         | Asia          | I  | 19 |
| p7845 (778/03)  | Czech Republic                      |         | Europe        | I  | 19 |
| 00-087          | Germany                             |         | Europe        | I  | 19 |
| 03-125          | Germany                             |         | Europe        | I  | 19 |
| 12-8312         | Greece                              | Crete   | Europe        | I  | 19 |
| 12-8271         | Greece                              |         | Europe        | I  | 19 |

|         |               |               |        |   |    |         |
|---------|---------------|---------------|--------|---|----|---------|
| 12-8355 | Hungary       |               | Europe | I | 19 | -       |
| p8488   | Poland        | Kutno         | Europe |   | 19 | Poland  |
| p8494   | Poland        | Radomsko      | Europe |   | 19 | Poland  |
| P8477   | Poland        | Sieradz       | Europe |   | 19 | Poland  |
| P8480   | Poland        |               | Europe |   | 19 | Poland  |
| 12-8100 | Isreal, Malta |               | mixed  | I | 19 | -       |
| 03-189  | Germany       | Saxony-Anhalt | Europe | I | 20 | Germany |
| UK6/7   | UK            | England       | Europe | I | 21 | UK      |
| UK25/7  | UK            | England       | Europe | I | 21 | UK      |

---
